# Supplementary material for: Upper Midwest lakes are supersaturated with N2
Source: PubMed Central journal article supplement — Proc Natl Acad Sci U S A. 2020 Jul 6;117(29):17063–7. doi: 10.1073/pnas.1921689117 (PMC7382251; doi:10.1073/pnas.1921689117), 2020-07-06
Supplement: pnas.1921689117.sapp.pdf [file pnas.1921689117.sapp.pdf]

Supplemental Table S1: List of lakes sampled with characteristics: County, overall trophic state, chlorophyll concentration, water clarity, maximum depth, lake area, littoral area, and perimeter information was obtained from Lake Finder on the Minnesota Department of Natural Resources (DNR) website for lakes in Minnesota. The information obtained from LakeFinder is the 10-year summer average. The Minnesota DNR does not sample each lake every year, so the 10-year average is based on the samples taken over a 10-year period. Similar information for lakes in Iowa was obtained from the Iowa Lakes Information System. The Iowa Lake Information System contained data collected by the Iowa DNR in summer 2016.

| Lake Name | County     | Number of times sampled | Trophic Name             | Chlorophyll (ppb) | Water Clarity (m) | Watershed use | Max depth (m) | Lake Area (km <sup>2</sup> ) | Percent Littoral | Perimeter (km) |
|-----------|------------|-------------------------|--------------------------|-------------------|-------------------|---------------|---------------|------------------------------|------------------|----------------|
| Buchanan  | Ottertail  | 1                       | Mesotrophic              | 7.85              | 2.90              | Agriculture   | 12.8          | 3.90                         | 86.70            | 12.96          |
| Itasca    | Clearwater | 4                       | Mesotrophic-Eutrophic    | 13                | 1.65              | Forest        | 12.2          | 4.31                         | 42.15            | 22.95          |
| Ozawindib | Clearwater | 4                       | Oligotrophic-Mesotrophic | 4.33              | 3.51              | Forest        | 24.4          | 0.64                         | 39.62            | 6.53           |
| Elk       | Clearwater | 4                       | Mesotrophic              | 4                 | 2.44              | Forest        | 28.3          | 1.23                         | 24.09            | 6.24           |
| Trout     | Cook       | 1                       | Oligotrophic-Mesotrophic | 1                 | 5.43              | Forest        | 23.5          | 1.05                         | 22.77            | 5.20           |
| Josephine | Hubbard    | 3                       | -                        | 1.3               | 0.80              | Forest        | 9.4           | 0.04                         | -                | -              |
| Arco      | Hubbard    | 4                       | -                        | 5.1               | 0                 | Forest        | 9.4           | 0.02                         | -                | -              |
| Long      | Hubbard    | 4                       | Mesotrophic              | 6                 | 3.05              | Forest        | 41.1          | 7.79                         | 24.29            | 30.43          |
| Deming    | Hubbard    | 3                       | -                        | 10.9              | 0.10              | Forest        | 17.4          | 0.06                         | -                | -              |
| Boot      | Hubbard    | 4                       | -                        | -                 | -                 | Forest        | 18            | 1.43                         | -                | -              |
| Mary      | Hubbard    | 4                       | -                        | 1.5               | 0.10              | Forest        | 12.5          | 0.22                         | 34.55            | 2.19           |
| Beckman   | Anoka      | 1                       | -                        | 28.3              | 0.70              | Developed     | -             | 0.04                         | -                | -              |
| Cedar Bog | Anoka      | 1                       | -                        | 57.2              | 1.50              | Developed     | -             | 0.01                         | 100              | -              |
| Fish      | Anoka      | 1                       | -                        | 9.6               | 0.20              | Developed     | 3.1           | 1.35                         | 100              | 5.42           |
| Pickereel | Freeborn   | 2                       | Eutrophic                | 187               | 0.17              | Agriculture   | 1.2           | 2.01                         | 100              | 9.12           |

1  
2  
3  
4  
5  
6  
7  
8  
9  
10  
11  
12  
13  
14  
15  
16  
17  
18  
19  
20  
21  
22  
23  
24  
25  
26  
27

| Lake Name         | County     | Number of times sampled | Trophic Name | Chlorophyll (ppb) | Water Clarity (m) | Watershed use | Max depth (m) | Lake Area (km <sup>2</sup> ) | Percent Littoral | Perimeter (km) |
|-------------------|------------|-------------------------|--------------|-------------------|-------------------|---------------|---------------|------------------------------|------------------|----------------|
| Minnesota         | Faribault  | 2                       | Eutrophic    | 35                | 0.34              | Agriculture   | 1.5           | 7.75                         | 100              | -              |
| Island            | St. Louis  | 1                       | Mesotrophic  | -                 | 1.40              | Forest        | 28.7          | 32.38                        | 40.74            | 186.8          |
| Boulder           | St. Louis  | 1                       | Mesotrophic  | 9                 | 1.77              | Forest        | 5.5           | 13.19                        | 98.37            | 56.46          |
| West Okoboji      | Dickinson  | 2                       | Mesotrophic  | 5                 | 4.82              | Agriculture   | 40.8          | 15.57                        | 59.5             | 31.87          |
| East Okoboji      | Dickinson  | 2                       | Eutrophic    | 23                | 1.80              | Agriculture   | 6.7           | 7.43                         | 30.7             | 27.04          |
| Lower Gar         | Dickinson  | 2                       | Eutrophic    | 16                | 0.91              | Agriculture   | 1.7           | 0.98                         | 100              | 6.28           |
| Minnewashta       | Dickinson  | 2                       | -            | -                 | -                 | Agriculture   | -             | -                            | 40.1             | -              |
| Upper Gar         | Dickinson  | 2                       | Eutrophic    | 32                | 1.52              | Agriculture   | 1.5           | 0.15                         | 100              | 1.93           |
| Lake of the Isles | Hennepin   | 1                       | Eutrophic    | 24                | 1.83              | Urban         | 9.4           | 0.44                         | 80.90            | 5.46           |
| Cedar Lake        | Hennepin   | 1                       | Eutrophic    | 9                 | 1.86              | Urban         | 15.5          | 0.66                         | 38.46            | 4.86           |
| Madison           | Blue Earth | 1                       | Eutrophic    | 57                | 0.64              | Agriculture   | 21.0          | 5.85                         | 49.92            | 19.96          |
| St James          | Watonwan   | 1                       | Eutrophic    | 26                | 0.70              | Agriculture   | 4.7           | 0.82                         | 100              | 6.02           |
| Whiteface         | St. Louis  | 1                       | Eutrophic    | 7                 | 1.25              | Forest        | 10.7          | 18.48                        | 98.08            | 149.49         |
| Namakan           | St. Louis  | 1                       | Mesotrophic  | 2                 | 3.26              | Forest        | 45.7          | 97.39                        | 20.88            | 514.88         |
| Sandpoint         | St. Louis  | 1                       | Mesotrophic  | 2                 | 2.41              | Forest        | 56.1          | 34.51                        | 33.38            | 238.22         |
| Entrance          | Clearwater | 1                       | -            | -                 | 1.50              | Forest        | -             | -                            | -                | -              |
| East Twin         | Clearwater | 1                       | -            | -                 | 2.10              | Forest        | -             | -                            | -                | -              |
| Geneva            | Freeborn   | 1                       | Eutrophic    | 34                | -                 | Agriculture   | 1.1           | 7.63                         | 99.99            | 20.76          |
| Fish              | Hennepin   | 1                       | Eutrophic    | 61                | 1.58              | Urban         | 14.9          | 0.96                         | 45.17            | 8.21           |

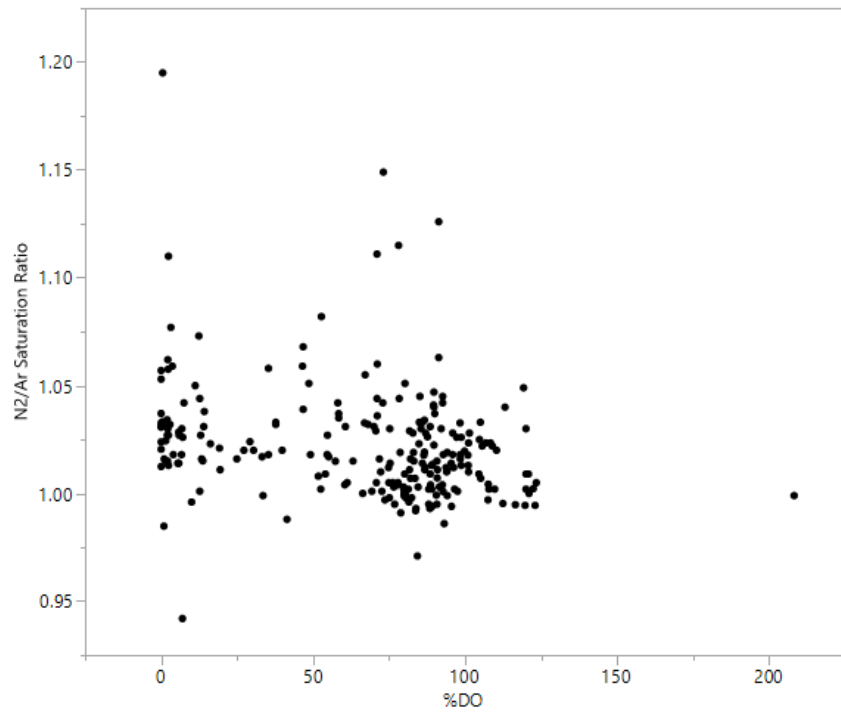

29

30 *Supplemental Figure S1: Relationship of dissolved oxygen and N<sub>2</sub>/Ar Saturation ratio.*

31  
32  
33

Supplemental Table S2: Information collected at each lake visit. Percent maximum depth refers to the area in the water column the sample was collected in relation to the maximum depth with values closer to 100 indicating samples taken from deeper in the water column. Dissolved oxygen saturation (%DO), specific conductivity, temperature, and pH were recorded the day of sampling using a Hydrolab water quality sonde.

| Lake Name | Temperature (°C) | Month     | N <sub>2</sub> /Ar Saturation Ratio | Depth (m) | Percent Maximum depth | %DO   | Specific Conductivity (µS) | pH   |
|-----------|------------------|-----------|-------------------------------------|-----------|-----------------------|-------|----------------------------|------|
| Arco      | 4.51             | February  | 1.100                               | 2         | 21.17                 |       |                            |      |
| Arco      | 4.51             | February  | 1.020                               | 4         | 42.33                 | 39.8  | 96                         | 6.8  |
| Arco      | 4.61             | February  | 1.062                               | 9         | 95.25                 | 2.2   | 174                        | 6.68 |
| Arco      | 20.54            | July      | 1.014                               | 2         | 21.17                 | 78.6  | 100                        | 8.21 |
| Arco      | 10.97            | July      | 1.004                               | 5         | 52.92                 | 88.6  | 102                        | 8.76 |
| Arco      | 7.01             | July      | 1.037                               | 7         | 74.08                 | 58.4  | 115                        | 6.69 |
| Arco      | 5.61             | July      | 1.042                               | 9         | 95.25                 | 7.5   | 218                        | 6.54 |
| Arco      | 7.97             | October   | 1.027                               | 7         | 74.08                 | 54.7  | 122                        | 6.37 |
| Arco      | 5.44             | October   | 0.996                               | 9         | 95.25                 | 10    | 246                        | 5.88 |
| Arco      | 11.31            | October   | 1.004                               | 2         | 21.17                 | 72.9  | 95                         | 6.88 |
| Arco      | 11.28            | October   | 1.001                               | 5         | 52.92                 | 69.3  | 96                         | 6.88 |
| Arco      | 21               | September | 1.025                               | 2         | 21.17                 | 87.6  | 103                        | 7.68 |
| Arco      | 16.7             | September | 1.003                               | 5         | 52.92                 | 122.4 | 105                        | 7.57 |
| Arco      | 8.6              | September | 1.058                               | 7         | 74.08                 | 2.3   | 112                        | 6.9  |
| Arco      | 7                | September | 1.025                               | 9         | 89.96                 | 1.5   | 246                        | 6.51 |
| Beckman   | 13               | May       | 1.007                               | 0         | 0                     | 105.1 | 56                         | 6.57 |
| Beckman   | 15.5             | May       | 1.009                               | 0.5       | 100                   | 98.7  | 57                         | 6.44 |
| Boot      | 2.89             | February  | 1.014                               | 2         | 11.12                 | 95.4  | 310                        | 8    |
| Boot      | 3.26             | February  | 1.011                               | 4         | 22.24                 | 90.9  | 306                        | 8    |
| Boot      | 3.3              | February  | 1.013                               | 6         | 33.36                 | 89    | 306                        | 8    |
| Boot      | 19.84            | July      | 1.005                               | 2         | 11.12                 | 75    | 318                        | 8.36 |
| Boot      | 19.06            | July      | 1.005                               | 5         | 27.8                  | 74.9  | 320                        | 8.31 |
| Boot      | 8.99             | July      | 1.020                               | 9         | 50.05                 | 83    | 331                        | 8.25 |
| Boot      | 7.2              | July      | 1.018                               | 15        | 83.41                 | 49.1  | 337                        | 7.13 |

|                   |       |           |       |      |        |       |     |      |
|-------------------|-------|-----------|-------|------|--------|-------|-----|------|
| <b>Boot</b>       | 6.09  | July      | 1.023 | 20   | 90     | 16.2  | 343 | 6.78 |
| <b>Boot</b>       | 5.56  | July      | 1.027 | 25   | 100    | 2     | 350 | 6.67 |
| <b>Boot</b>       | 12.18 | October   | 1.060 | 2    | 11.12  | 91.3  | 300 | 7.75 |
| <b>Boot</b>       | 12.18 | October   | 0.994 | 5    | 27.8   | 95.5  | 301 | 7.7  |
| <b>Boot</b>       | 12.18 | October   | 1.028 | 10   | 55.61  | 101.4 | 300 | 7.7  |
| <b>Boot</b>       | 8.14  | October   | 1.030 | 15   | 83.41  | 46.7  | 331 | 6.78 |
| <b>Boot</b>       | 7.1   | October   | 1.045 | 18   | 100.09 | 35.3  | 328 | 6.7  |
| <b>Boot</b>       | 20.33 | September | 1.024 | 2    | 11.12  | 106.8 | 294 | 8.44 |
| <b>Boot</b>       | 18.6  | September | 1.023 | 7    | 38.93  | 108.3 | 319 | 8.3  |
| <b>Boot</b>       | 8.5   | September | 1.032 | 12   | 66.73  | 66.9  | 350 | 7.62 |
| <b>Boot</b>       | 6.98  | September | 1.034 | 17   | 94.53  | 0     | 350 | 7.22 |
| <b>Boot</b>       | 6.05  | September | 1.037 | 22   | 100    | 0     | 353 | 7.13 |
| <b>Boulder</b>    | 25    | May       | 0.999 | 0.5  | 9.11   | 94.1  | 58  | 7.29 |
| <b>Boulder</b>    | 15    | May       | 0.998 | 1.5  | 27.34  | 75.1  | 58  | 6.82 |
| <b>Buchanan</b>   | 22.72 | August    | 1.048 | 2    | 15.62  | 92.6  | 388 | 8.79 |
| <b>Buchanan</b>   | 22.6  | August    | 1.042 | 4    | 31.25  | 92.6  | 388 | 8.79 |
| <b>Buchanan</b>   | 22.58 | August    | 1.166 | 5    | 39.06  | 91.3  | 389 | 8.76 |
| <b>Buchanan</b>   | 22.39 | August    | 1.115 | 7    | 54.68  | 78.1  | 390 | 8.71 |
| <b>Buchanan</b>   | 22.17 | August    | 1.111 | 9    | 70.3   | 71    | 393 | 8.61 |
| <b>Buchanan</b>   | 21.74 | August    | 1.059 | 10.5 | 82.02  | 46.5  | 401 | 8.28 |
| <b>Buchanan</b>   | 19.74 | August    | 1.050 | 11.5 | 89.83  | 11.2  | 428 | 7.57 |
| <b>Cedar Bog</b>  | 10.14 | May       | 1.012 | 0    | 0      | 96.2  | 57  | 6.67 |
| <b>Cedar Bog</b>  | 10.14 | May       | 1.012 | 1    | 100    | 74.8  | 336 | 6.8  |
| <b>Cedar Lake</b> | 21.68 | June      | 1.025 | 2    | 12.87  | 104.7 | 664 | 8.05 |
| <b>Cedar Lake</b> | 12.71 | June      | 1.016 | 5    | 32.17  | 82    | 719 | 6.79 |
| <b>Cedar Lake</b> | 9.45  | June      | 1.021 | 7    | 45.03  | 51.7  | 730 | 6.66 |
| <b>Cedar Lake</b> | 7.33  | June      | 1.013 | 9    | 57.9   | 24.9  | 762 | 6.41 |
| <b>Deming</b>     | 8.19  | July      | 1.014 | 2    | 11.51  | 71.8  | 135 | 8.19 |
| <b>Deming</b>     | 6.94  | July      | 1.005 | 4    | 23.02  | 61.2  | 136 | 6.94 |
| <b>Deming</b>     | 5.18  | July      | 1.027 | 6    | 34.54  | 5.9   | 164 | 6.59 |
| <b>Deming</b>     | 4.68  | July      | 1.060 | 9    | 51.8   | 3.2   | 209 | 6.34 |
| <b>Deming</b>     | 5.07  | July      | 1.127 | 14   | 80.58  | 2.4   | 597 | 5.99 |
| <b>Deming</b>     | 4.92  | October   | 1.001 | 10   | 57.56  | 12.7  | 299 | 5.93 |
| <b>Deming</b>     | 5.02  | October   | 0.924 | 12   | 69.07  | 7     | 502 | 5.02 |

|                     |       |           |       |     |       |       |     |      |
|---------------------|-------|-----------|-------|-----|-------|-------|-----|------|
| <b>Deming</b>       | 5.11  | October   | 1.014 | 14  | 80.58 | 5.8   | 550 | 5.62 |
| <b>Deming</b>       | 10.26 | October   | 0.992 | 2   | 11.51 | 83.7  | 124 | 7.05 |
| <b>Deming</b>       | 9.39  | October   | 0.991 | 5   | 28.78 | 78.8  | 138 | 6.87 |
| <b>Deming</b>       | 20.8  | September | 1.011 | 2   | 11.51 | 94.1  | 136 | 8.04 |
| <b>Deming</b>       | 10.4  | September | 1.028 | 5   | 28.78 | 5.8   | 156 | 7.06 |
| <b>Deming</b>       | 5.7   | September | 1.032 | 8   | 46.05 | 1.9   | 197 | 6.57 |
| <b>Deming</b>       | 5.4   | September | 0.986 | 12  | 69.07 | 0.9   | 475 | 6.14 |
| <b>East Okoboji</b> | 22.94 | August    | 1.041 | 2   | 29.83 | 89.6  | 418 | 8.14 |
| <b>East Okoboji</b> | 22.74 | August    | 1.068 | 4   | 59.65 | 46.7  | 417 | 7.96 |
| <b>East Okoboji</b> | 22.49 | August    | 1.034 | 6   | 89.48 | 58.4  | 424 | 7.31 |
| <b>East Okoboji</b> | 16.81 | May       | 1.001 | 2   | 29.83 | 97.5  | 352 | 8.41 |
| <b>East Okoboji</b> | 16.48 | May       | 1.001 | 4   | 59.65 | 92.7  | 353 | 8.48 |
| <b>East Okoboji</b> | 16.36 | May       | 0.999 | 6   | 89.48 | 90.5  | 357 | 8.41 |
| <b>Elk</b>          | 2.34  | February  | 0.986 | 2   | 7.06  | 93.1  | 300 | 6.63 |
| <b>Elk</b>          | 2.57  | February  | 1.028 | 5   | 17.64 | 84.9  | 295 | 7.03 |
| <b>Elk</b>          | 2.8   | February  | 0.999 | 10  | 35.28 | 72.2  | 303 | 7.09 |
| <b>Elk</b>          | 20.07 | July      | 1.007 | 2   | 7.06  | 83.5  | 305 | 8.46 |
| <b>Elk</b>          | 18.67 | July      | 1.007 | 5   | 17.64 | 82    | 307 | 8.36 |
| <b>Elk</b>          | 7.7   | July      | 1.017 | 9   | 31.75 | 33.2  | 332 | 6.96 |
| <b>Elk</b>          | 6.45  | July      | 1.016 | 15  | 52.92 | 13.3  | 331 | 6.77 |
| <b>Elk</b>          | 5.49  | July      | 1.013 | 20  | 70.56 | 2.4   | 337 | 6.68 |
| <b>Elk</b>          | 5.32  | July      | 1.013 | 25  | 88.19 | 1     | 347 | 6.74 |
| <b>Elk</b>          | 11.39 | October   | 1.049 | 10  | 35.28 | 80.2  | 301 | 7.5  |
| <b>Elk</b>          | 7.12  | October   | 1.084 | 14  | 49.39 | 12.4  | 330 | 6.76 |
| <b>Elk</b>          | 6.04  | October   | 1.014 | 18  | 63.5  | 5.5   | 335 | 6.68 |
| <b>Elk</b>          | 11.98 | October   | 0.995 | 2   | 7.06  | 88    | 295 | 7.67 |
| <b>Elk</b>          | 11.9  | October   | 0.993 | 5   | 17.64 | 83.8  | 295 | 7.67 |
| <b>Elk</b>          | 20.42 | September | 1.021 | 2   | 7.06  | 105.6 | 293 | 8.35 |
| <b>Elk</b>          | 15.34 | September | 0.999 | 7   | 24.69 | 80.5  | 339 | 7.81 |
| <b>Elk</b>          | 8.46  | September | 1.015 | 10  | 35.28 | 13.7  | 342 | 7.29 |
| <b>Elk</b>          | 6.79  | September | 1.012 | 15  | 52.92 | 0     | 343 | 7.1  |
| <b>Elk</b>          | 5.52  | September | 1.016 | 22  | 77.61 | 1.5   | 359 | 7.05 |
| <b>Fish</b>         | 13    | May       | 1.002 | 0.5 | 16.4  | 109.7 | 91  | 7.77 |
| <b>Fish</b>         | 12.5  | May       | 1.002 | 1   | 32.81 | 107.8 | 91  | 7.91 |
| <b>Fish Lake</b>    | 17.63 | July      | 1.057 | 6   | 40.17 | 0     | 469 | 7.13 |

|                  |       |          |       |      |       |       |     |      |
|------------------|-------|----------|-------|------|-------|-------|-----|------|
| <b>Fish Lake</b> | 25.46 | July     | 1.060 | 4    | 26.78 | 71.1  | 453 | 7.63 |
| <b>Fish Lake</b> | 22.43 | July     | 1.053 | 5    | 33.48 | 0     | 461 | 7.24 |
| <b>Fish Lake</b> | 25.96 | July     | 1.040 | 3    | 20.09 | 89.7  | 454 | 7.78 |
| <b>Fish Lake</b> | 26.39 | July     | 1.040 | 2    | 13.39 | 113.1 | 450 | 8.06 |
| <b>Geneva</b>    | 21.21 | August   | 1.015 | 0.5  | 41.01 | 98.4  | 351 | 8.32 |
| <b>Geneva</b>    | 21.43 | August   | 1.045 | 0.5  | 41.01 | 98.4  | 351 | 8.32 |
| <b>Island</b>    | 11.5  | May      | 1.014 | 2    | 6.98  | 85.9  | 54  | 6.56 |
| <b>Island</b>    | 10.5  | May      | 1.009 | 6    | 20.94 | 80.1  | 54  | 6.62 |
| <b>Island</b>    | 10.5  | May      | 1.005 | 8    | 27.92 | 77.9  | 55  | 6.79 |
| <b>Island</b>    | 10    | May      | 1.003 | 12   | 41.88 | 76.5  | 55  | 7.05 |
| <b>Itasca</b>    | 1.26  | February | 0.988 | 2    | 16.4  | 84.3  | 329 | 7.78 |
| <b>Itasca</b>    | 2.19  | February | 1.002 | 5    | 41.01 | 52.5  | 338 | 7.58 |
| <b>Itasca</b>    | 2.68  | February | 0.988 | 7    | 57.41 | 41.4  | 354 | 7.56 |
| <b>Itasca</b>    | 20.66 | July     | 0.999 | 1    | 8.2   | 79.9  | 339 | 8.7  |
| <b>Itasca</b>    | 20.65 | July     | 1.000 | 1.5  | 12.3  | 80    | 339 | 8.71 |
| <b>Itasca</b>    | 20.65 | July     | 1.000 | 2    | 16.4  | 80.1  | 339 | 8.71 |
| <b>Itasca</b>    | 20.6  | July     | 1.001 | 2.5  | 20.51 | 80.2  | 339 | 8.71 |
| <b>Itasca</b>    | 20.56 | July     | 1.000 | 3    | 24.61 | 80.3  | 338 | 8.71 |
| <b>Itasca</b>    | 20.53 | July     | 1.002 | 3.5  | 28.71 | 80    | 338 | 8.7  |
| <b>Itasca</b>    | 20.47 | July     | 1.002 | 4    | 32.81 | 79.8  | 337 | 8.7  |
| <b>Itasca</b>    | 20.38 | July     | 1.003 | 4.5  | 36.91 | 79.7  | 337 | 8.64 |
| <b>Itasca</b>    | 20.4  | July     | 1.004 | 5    | 41.01 | 77.8  | 340 | 8.58 |
| <b>Itasca</b>    | 19.52 | July     | 1.031 | 5.5  | 45.11 | 71    | 343 | 8.54 |
| <b>Itasca</b>    | 19.32 | July     | 1.032 | 6    | 49.21 | 68.1  | 343 | 8.42 |
| <b>Itasca</b>    | 18.4  | July     | 1.031 | 6.5  | 53.31 | 60.6  | 350 | 8.07 |
| <b>Itasca</b>    | 15.97 | July     | 1.032 | 7    | 57.41 | 37.7  | 361 | 7.77 |
| <b>Itasca</b>    | 15.97 | July     | 1.033 | 7.5  | 61.52 | 37.7  | 361 | 7.77 |
| <b>Itasca</b>    | 14.56 | July     | 1.031 | 8    | 65.62 | 14    | 367 | 7.68 |
| <b>Itasca</b>    | 13.68 | July     | 1.026 | 8.5  | 69.72 | 7.1   | 366 | 7.65 |
| <b>Itasca</b>    | 11.98 | July     | 1.059 | 9    | 73.82 | 3.7   | 369 | 7.65 |
| <b>Itasca</b>    | 10.86 | July     | 1.049 | 9.5  | 77.92 | 2.9   | 372 | 7.63 |
| <b>Itasca</b>    | 10.15 | July     | 1.027 | 10   | 82.02 | 2.4   | 376 | 7.61 |
| <b>Itasca</b>    | 9.55  | July     | 1.030 | 10.5 | 86.12 | 2.2   | 385 | 7.57 |
| <b>Itasca</b>    | 11.46 | October  | 1.029 | 8    | 65.62 | 70.6  | 313 | 7.23 |
| <b>Itasca</b>    | 11.46 | October  | 1.031 | 10   | 82.02 | 70    | 314 | 7.08 |

|                          |       |           |       |      |       |       |     |      |
|--------------------------|-------|-----------|-------|------|-------|-------|-----|------|
| <b>Itasca</b>            | 11.49 | October   | 0.997 | 2    | 16.4  | 76.2  | 313 | 7.37 |
| <b>Itasca</b>            | 11.47 | October   | 0.997 | 4    | 32.81 | 73.6  | 314 | 7.35 |
| <b>Itasca</b>            | 11.47 | October   | 1.001 | 6    | 49.21 | 72.6  | 314 | 7.31 |
| <b>Itasca</b>            | 20.61 | September | 1.019 | 2    | 16.4  | 86.6  | 326 | 8.1  |
| <b>Itasca</b>            | 19.5  | September | 1.019 | 7    | 57.41 | 86.4  | 339 | 7.95 |
| <b>Itasca</b>            | 15.88 | September | 1.006 | 9    | 73.82 | 90.8  | 391 | 7.44 |
| <b>Itasca</b>            | 10.43 | September | 1.034 | 11   | 90.22 | 98.3  | 448 | 7.24 |
| <b>Josephine</b>         | 20.77 | July      | 1.014 | 2    | 21.17 | 75.3  | 69  | 8.13 |
| <b>Josephine</b>         | 18.49 | July      | 0.995 | 4    | 42.33 | 76.8  | 69  | 8.08 |
| <b>Josephine</b>         | 9.1   | July      | 1.016 | 7    | 74.08 | 35.3  | 73  | 6.75 |
| <b>Josephine</b>         | 7.26  | July      | 1.018 | 9    | 95.25 | 6.7   | 82  | 6.44 |
| <b>Josephine</b>         | 11.57 | October   | 1.023 | 7    | 74.08 | 82.8  | 64  | 6.94 |
| <b>Josephine</b>         | 10.52 | October   | 1.030 | 9.5  | 100   | 75.2  | 92  | 6.59 |
| <b>Josephine</b>         | 11.64 | October   | 0.996 | 2    | 21.17 | 90.7  | 64  | 6.95 |
| <b>Josephine</b>         | 11.63 | October   | 0.995 | 5    | 52.92 | 84.5  | 64  | 6.95 |
| <b>Josephine</b>         | 21.2  | September | 1.014 | 2    | 21.17 | 89.3  | 71  | 7.53 |
| <b>Josephine</b>         | 20.9  | September | 1.012 | 5    | 52.92 | 86.9  | 71  | 7.45 |
| <b>Josephine</b>         | 11.1  | September | 1.035 | 9    | 95.25 | 2     | 65  | 5.98 |
| <b>Josephine</b>         | 8.7   | September | 1.034 | 10.5 | 100   | 0.5   | 186 | 6.2  |
| <b>Lake of the Isles</b> | 23.01 | June      | 1.016 | 2    | 21.17 | 83.1  | 609 | 8.75 |
| <b>Lake of the Isles</b> | 23.01 | June      | 1.016 | 2    | 21.17 | 83.1  | 609 | 8.75 |
| <b>Long</b>              | 2.77  | February  | 1.020 | 2    | 4.86  | 110.3 | 333 | 7.98 |
| <b>Long</b>              | 3.23  | February  | 1.019 | 5    | 12.15 | 94.1  | 331 | 8.03 |
| <b>Long</b>              | 3.84  | February  | 1.018 | 18   | 43.74 | 71.1  | 342 | 7.96 |
| <b>Long</b>              | 19.33 | July      | 1.009 | 2    | 4.86  | 120   | 339 |      |
| <b>Long</b>              | 18.99 | July      | 1.003 | 4    | 9.72  | 120   | 339 |      |
| <b>Long</b>              | 17.91 | July      | 1.002 | 6    | 14.58 | 120   | 339 |      |
| <b>Long</b>              | 11.83 | July      | 1.030 | 9    | 21.87 | 120   | 352 |      |
| <b>Long</b>              | 9.04  | July      | 1.033 | 11   | 26.73 | 105   | 350 |      |
| <b>Long</b>              | 6.97  | July      | 1.028 | 14   | 34.02 | 87    | 351 |      |
| <b>Long</b>              | 12.55 | October   | 1.025 | 2    | 4.86  | 89.7  | 324 | 7.98 |
| <b>Long</b>              | 12.53 | October   | 0.994 | 5    | 12.15 | 89.1  | 324 | 7.96 |
| <b>Long</b>              | 12.51 | October   | 1.026 | 10   | 24.3  | 88.5  | 324 | 7.95 |



|                    |       |           |       |     |       |       |     |      |
|--------------------|-------|-----------|-------|-----|-------|-------|-----|------|
| <b>Long</b>        | 7.56  | October   | 1.011 | 15  | 36.45 | 19.4  | 360 | 6.95 |
| <b>Long</b>        | 6.87  | October   | 1.026 | 18  | 43.74 | 14.2  | 365 | 6.86 |
| <b>Long</b>        | 8.21  | September | 1.022 | 2   | 4.86  | 109   | 335 | 8.21 |
| <b>Long</b>        | 8.27  | September | 1.022 | 7   | 17.01 | 108.9 | 336 | 8.27 |
| <b>Long</b>        | 11.16 | September | 1.024 | 11  | 26.73 | 89.7  | 369 | 7.63 |
| <b>Long</b>        | 7.17  | September | 1.032 | 15  | 36.45 | 0     | 377 | 7.18 |
| <b>Long</b>        | 6.17  | September | 1.037 | 22  | 53.47 | 0     | 389 | 6.99 |
| <b>Lower Gar</b>   | 22.68 | August    | 1.026 | 0.5 | 27.34 | 98.9  | 382 |      |
| <b>Lower Gar</b>   | 22.67 | August    | 1.026 | 1   | 54.68 | 98.7  | 381 |      |
| <b>Lower Gar</b>   | 19.05 | May       | 0.994 | 0.5 | 27.34 | 119.7 | 361 | 8.77 |
| <b>Lower Gar</b>   | 18.73 | May       | 0.994 | 1   | 54.68 | 123   | 356 | 9.02 |
| <b>Madison</b>     | 23.08 | June      | 1.019 | 2   | 9.51  |       |     |      |
| <b>Madison</b>     | 22.89 | June      | 1.018 | 5   | 23.77 |       |     |      |
| <b>Madison</b>     | 17.81 | June      | 1.016 | 7   | 33.28 |       |     |      |
| <b>Madison</b>     | 15.07 | June      | 1.012 | 8.5 | 40.42 |       |     |      |
| <b>Mary</b>        | 1.63  | February  | 1.002 | 2   | 16    | 96.5  | 278 | 8.03 |
| <b>Mary</b>        | 3.45  | February  | 0.995 | 7   | 56.01 | 66.3  | 295 | 7.54 |
| <b>Mary</b>        | 2.85  | February  | 0.998 | 5   | 40.01 | 82.4  | 287 | 7.63 |
| <b>Mary</b>        | 20.34 | July      | 1.011 | 2   | 16    | 81.7  | 300 | 8.29 |
| <b>Mary</b>        | 16.37 | July      | 1.005 | 4   | 32.01 | 70.8  | 312 | 7.54 |
| <b>Mary</b>        | 9.63  | July      | 1.017 | 6   | 48.01 | 29.2  | 314 | 6.91 |
| <b>Mary</b>        | 8.22  | July      | 1.015 | 8   | 64.02 | 4     | 317 | 6.73 |
| <b>Mary</b>        | 7.96  | July      | 1.015 | 9   | 72.02 | 2.1   | 320 | 6.71 |
| <b>Mary</b>        | 12.03 | October   | 1.003 | 2   | 16    | 81.5  | 283 | 7.58 |
| <b>Mary</b>        | 12.01 | October   | 1.023 | 4   | 32.01 | 84.8  | 283 | 7.52 |
| <b>Mary</b>        | 12    | October   | 1.045 | 5   | 40.01 | 85.1  | 283 | 7.52 |
| <b>Mary</b>        | 11.94 | October   | 1.026 | 7   | 56.01 | 85.9  | 283 | 7.51 |
| <b>Mary</b>        | 11.8  | October   | 1.034 | 9   | 72.02 | 86.6  | 284 | 7.45 |
| <b>Mary</b>        | 20.93 | September | 1.020 | 2   | 16    | 99.8  | 286 | 8.21 |
| <b>Mary</b>        | 19.13 | September | 1.015 | 5   | 40.01 | 57.3  | 319 | 7.5  |
| <b>Mary</b>        | 15.65 | September | 1.024 | 6   | 48.01 | 0     | 318 | 7.22 |
| <b>Mary</b>        | 12.01 | September | 1.021 | 7   | 56.01 | 0     | 328 | 7.18 |
| <b>Minnesota 1</b> | 14.5  | May       | 1.001 | 0.2 | 13.12 | 121   | 424 | 8.27 |
| <b>Minnesota 1</b> | 14.5  | May       | 0.999 | 0.5 | 32.81 | 123.4 | 423 | 8.25 |
| <b>Minnesota 2</b> | 14.5  | May       | 0.999 | 0   | 0     | 208.2 | 426 | 8.2  |

|                    |       |           |       |      |       |       |     |      |
|--------------------|-------|-----------|-------|------|-------|-------|-----|------|
| <b>Minnesota 2</b> | 14.5  | May       | 0.997 | 0.5  | 32.81 | 107.5 | 425 | 8.2  |
| <b>Minnewashta</b> | 23.08 | August    | 1.030 | 2    | 39.77 | 92.1  | 389 | 8.05 |
| <b>Minnewashta</b> | 22.59 | August    | 1.030 | 4    | 79.54 | 85.5  | 386 | 7.92 |
| <b>Minnewashta</b> | 18.03 | May       | 0.995 | 2    | 39.77 | 112.4 | 360 | 8.69 |
| <b>Minnewashta</b> | 17.19 | May       | 0.995 | 4    | 79.54 | 116.5 | 363 | 8.46 |
| <b>Namaken</b>     | 7.16  | August    | 1.010 | 2    | 4.37  | 101.1 | 48  | 7.18 |
| <b>Namaken</b>     | 7.05  | August    | 1.015 | 5    | 10.94 | 95.9  | 48  | 7.06 |
| <b>Namaken</b>     | 7.01  | August    | 1.010 | 7    | 15.31 | 93.9  | 48  | 7.01 |
| <b>Namaken</b>     | 6.8   | August    | 1.011 | 10   | 21.87 | 86.7  | 48  | 6.8  |
| <b>Ozawindib</b>   | 1.87  | February  | 1.006 | 5    | 20.51 | 92.5  | 163 | 7.76 |
| <b>Ozawindib</b>   | 3.05  | February  | 1.002 | 10   | 41.01 | 81.3  | 167 | 7.59 |
| <b>Ozawindib</b>   | 3.47  | February  | 0.998 | 20   | 82.02 | 33.5  | 192 | 7.27 |
| <b>Ozawindib</b>   | 1.87  | February  | 1.012 | 2    | 8.2   | 97.2  | 165 | 7.76 |
| <b>Ozawindib</b>   | 3.19  | February  | 1.004 | 15   | 61.52 | 60.4  | 177 | 7.39 |
| <b>Ozawindib</b>   | 20.1  | July      | 1.044 | 2    | 8.2   | 78.3  | 181 | 8.24 |
| <b>Ozawindib</b>   | 13.9  | July      | 1.029 | 5    | 20.51 | 81.7  | 178 | 7.81 |
| <b>Ozawindib</b>   | 7.11  | July      | 1.017 | 9    | 36.91 | 55.1  | 180 | 6.89 |
| <b>Ozawindib</b>   | 6.16  | July      | 1.020 | 15   | 61.52 | 30.4  | 183 | 6.62 |
| <b>Ozawindib</b>   | 6.1   | July      | 1.020 | 19   | 77.92 | 27.2  | 185 | 6.57 |
| <b>Ozawindib</b>   | 7.39  | October   | 1.016 | 10   | 41.01 | 63.1  | 173 | 6.85 |
| <b>Ozawindib</b>   | 6.53  | October   | 1.017 | 12   | 49.21 | 19.2  | 177 | 6.43 |
| <b>Ozawindib</b>   | 6.34  | October   | 1.025 | 15   | 61.52 | 13    | 178 | 6.29 |
| <b>Ozawindib</b>   | 11.55 | October   | 1.003 | 2    | 8.2   | 91.5  | 167 | 7.66 |
| <b>Ozawindib</b>   | 11.45 | October   | 0.993 | 5    | 20.51 | 88.4  | 167 | 7.5  |
| <b>Ozawindib</b>   | 20.1  | September | 1.024 | 2    | 8.2   | 101.1 | 179 | 8.07 |
| <b>Ozawindib</b>   | 20.1  | September | 1.017 | 5    | 20.51 | 100.9 | 179 | 8.01 |
| <b>Ozawindib</b>   | 8.91  | September | 1.019 | 9    | 36.91 | 54.6  | 183 | 7.15 |
| <b>Ozawindib</b>   | 6.34  | September | 1.031 | 12.5 | 51.26 | 0     | 186 | 6.81 |
| <b>Pickerel 1</b>  | 13.5  | May       | 1.013 | 0    | 0     | 101   | 431 | 7.87 |
| <b>Pickerel 1</b>  | 13.5  | May       | 1.015 | 1    | 82.02 | 90.7  | 435 | 7.83 |
| <b>Pickerel 2</b>  | 13.5  | May       | 1.009 | 0    | 0     | 120.8 | 426 | 7.93 |
| <b>Pickerel 2</b>  | 13    | May       | 1.009 | 1    | 82.02 | 104.5 | 426 | 7.87 |
| <b>Sandpoint</b>   | 12    | August    | 1.050 | 10   | 17.83 | 48.6  | 66  | 6.33 |
| <b>Sandpoint</b>   | 9     | August    | 1.040 | 12.5 | 22.29 | 58.1  | 65  | 6.31 |
| <b>Sandpoint</b>   | 22.09 | August    | 1.010 | 2    | 3.57  | 93.7  | 72  | 7.07 |

|                  |       |        |       |     |       |       |     |      |
|------------------|-------|--------|-------|-----|-------|-------|-----|------|
| <b>Sandpoint</b> | 18.63 | August | 1.009 | 7   | 12.48 | 54    | 69  | 6.54 |
| <b>St. James</b> | 23.3  | June   | 1.034 | 0.5 | 10.65 |       |     |      |
| <b>St. James</b> | 23.29 | June   | 1.032 | 2   | 42.61 |       |     |      |
| <b>Trout</b>     | 16.11 | June   | 1.031 | 5   | 21.3  | 90    | 33  | 7.58 |
| <b>Trout</b>     | 16.11 | June   | 1.007 | 7   | 29.83 | 88.5  | 33  | 7.29 |
| <b>Trout</b>     | 16.11 | June   | 1.002 | 8   | 34.09 | 89    | 33  | 6.91 |
| <b>Trout</b>     | 16.11 | June   | 1.002 | 9   | 38.35 | 88    | 33  | 6.78 |
| <b>Trout</b>     | 16.11 | June   | 1.028 | 2   | 8.52  | 95.9  | 34  | 7.71 |
| <b>Trout</b>     | 16.11 | June   | 1.018 | 3   | 12.78 | 92.8  | 34  | 7.45 |
| <b>Upper Gar</b> | 8.13  | August | 1.049 | 0.5 | 32.81 | 119.2 | 408 | 8.52 |
| <b>Upper Gar</b> | 7.81  | August | 1.030 | 2   | 100   | 6.8   | 647 | 6.91 |
| <b>Upper Gar</b> | 18.32 | May    | 1.004 | 1   | 65.62 | 107.6 | 350 | 9.48 |
| <b>Whiteface</b> | 18.56 | August | 1.149 | 2   | 18.75 | 73.1  | 61  | 7.09 |
| <b>Whiteface</b> | 18.56 | August | 1.055 | 4   | 37.5  | 67.1  | 61  | 6.91 |
| <b>Whiteface</b> | 18.56 | August | 1.082 | 6   | 56.24 | 52.7  | 62  | 6.77 |
| <b>Whiteface</b> | 18.56 | August | 1.044 | 8   | 74.99 | 12.7  | 64  | 6.52 |
| <b>Whiteface</b> | 18.56 | August | 1.195 | 9   | 84.36 | 0.5   | 66  | 6.49 |

34

35

36
